# Supplementary material for: The immediate upstream region of the 5′-UTR from the AUG start codon has a pronounced effect on the translational efficiency in Arabidopsis thaliana
Source: PubMed Central journal article supplement — Nucleic Acids Res. 2013 Sep 30;42(1):485–98. doi: 10.1093/nar/gkt864 (PMC3874180; doi:10.1093/nar/gkt864), 2013-09-30
Supplement: supp_gkt864_nar-01513-v-2013-File014.pdf [file supp_gkt864_nar-01513-v-2013-File014.pdf]

## Supplemental Figures

### Supplemental Figure S1. The secondary structure analysis of various 5'-UTR constructs used in this study.

The entire 5'-UTR consisting of the 165 nucleotide 5'-UTR from the expression vector and the 21 nucleotide region of the 5'-UTR from various Arabidopsis genes was analyzed for the possible secondary structure using centroidfold (<http://www.ncrna.org/centroidfold/>). The 21 nucleotide 5'-UTRs from various Arabidopsis genes are in the capital letters. The probability of the secondary structure formation was color-coded. Heat color gradation from blue to red represents the base-pairing probability from 0 to 1. The base-pairing probability is the probability that a pair of bases forms a base-pair via hydrogen bonds in the secondary structure.

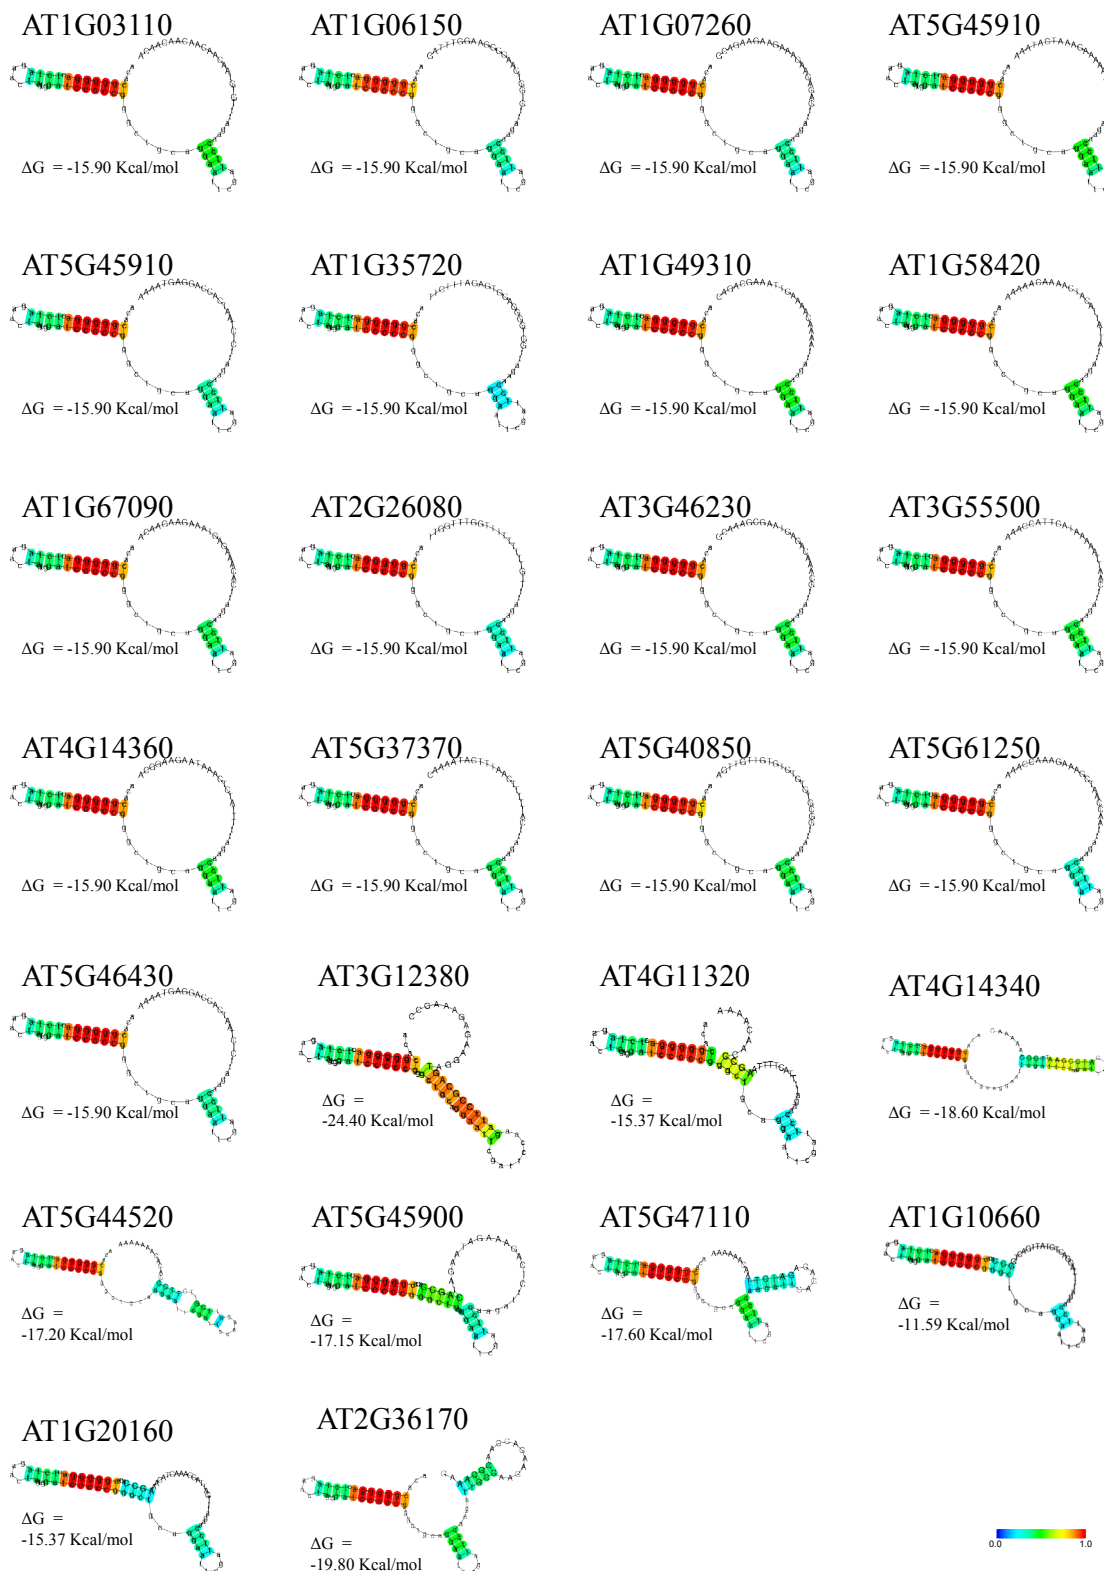

**Supplemental Figure S2. The secondary structure analysis of triple A substitution mutants of the AT5G40850 5'-UTR constructs used in this study.**

The entire 5'-UTR consisting of the 165 nucleotide 5'-UTR from the expression vector and the 21 nucleotide region of the wild-type or triple A substitution mutants of the AT5G40850 5'-UTR was analyzed for the possible secondary structure using centroidfold (<http://www.ncrna.org/centroidfold/>). The probability of the hairpin formation was color-coded. Heat color gradation from blue to red represents the base-pairing probability from 0 to 1. The wild-type or triple A substitution mutants of the 21 nucleotide AT5G40850 5'-UTR are in the capital letters.

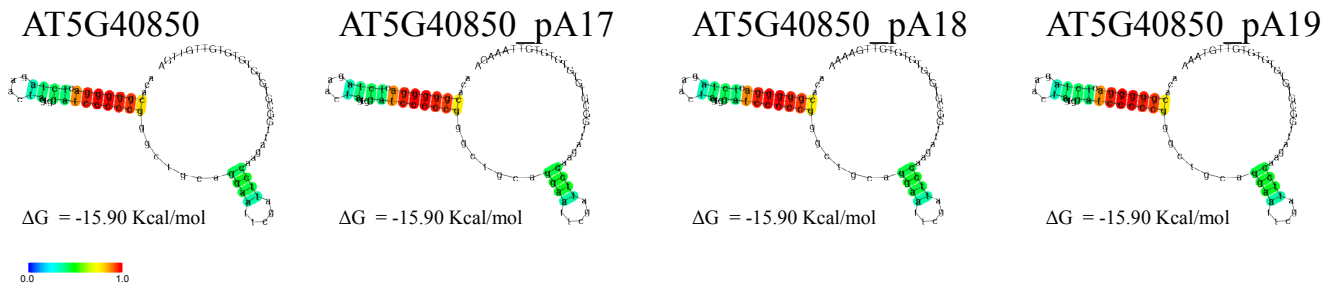

**Supplemental Figure S3. Sequence analysis of 5'-UTRs in the entire Arabidopsis genes.**

The 5'-UTRs of the entire Arabidopsis genes were analyzed using weblogo (<http://weblogo.berkeley.edu/>) to identify any preferred nucleotides in the 5'-UTR region from positions -1 to -21.

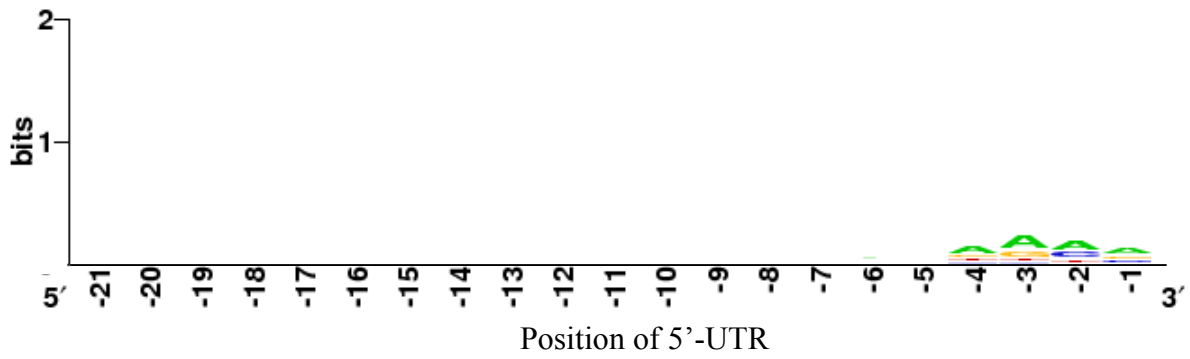

Supplemental Tables

Supplemental Table S1. The nucleotide sequences of primers for vector construction

| group            | decription                             | sequence 5' → 3'                                 | Lower case letter                            | Upper case |
|------------------|----------------------------------------|--------------------------------------------------|----------------------------------------------|------------|
| P1               | RbcS1A_5'UTR_10nt                      | AAGAAGAACatgagtaaaggagaagaact                    | overlapping sequences for smGFP              | 5'UTR      |
|                  | RbcS1A_5'UTR_21nt                      | CACAAAGAGTAAAGAAGAACAatgagtaaaggagaagaact        | overlapping sequences for smGFP              | 5'UTR      |
| P2               | smGFP_3'                               | tattgttatattcatcca                               | overlapping sequences for smGFP              | -          |
| P3               | RbcS1A_5'UTR_46nt                      | AAAGCACTAGACCAAACTCAGTCACacaaagagtaaaggagaagaact | overlapping sequences for RbcS1A_5'UTR_21nt  | 5'UTR      |
|                  | RbcS1A_5'UTR_72nt                      | GTTGTTATCATTATATATAGATGACCAaagcactagaccaaacct    | overlapping sequences for RbcS1A_5'UTR_46nt  | 5'UTR      |
|                  | RbcS1A_5'UTR_94nt                      | CACCTCAAAGCTTGTCTCATTgtgtttatcattatataatagatg    | overlapping sequences for RbcS1A_5'UTR_72nt  | 5'UTR      |
|                  | RbcS1A_5'UTR_121nt                     | AATCTCATGTATCTAGACCTCCGATcactcaaagctgttct        | overlapping sequences for RbcS1A_5'UTR_94nt  | 5'UTR      |
|                  | RbcS1A_5'UTR_147nt                     | CAACGGGTAGATCTTAGTCCACTTgaatctcatgtatctagac      | overlapping sequences for RbcS1A_5'UTR_121nt | 5'UTR      |
|                  | RbcS1A_5'UTR_175nt                     | AACCTCACATATCCACTCAAATCcaacgggtgtagatccta        | overlapping sequences for RbcS1A_5'UTR_175nt | 5'UTR      |
| P4               | AT1G35720_5'-UTR                       | AACACTAAAAGTAGAAGAAAatgagtaaaggagaaga            | overlapping sequences for smGFP              | 5'UTR      |
|                  | AT5G45900_5'-UTR                       | CTCAGA AAGATAAGATCGCCatgagtaaaggagaaga           | overlapping sequences for smGFP              | 5'UTR      |
|                  | AT5G61250_5'-UTR                       | AACCAATCGAAAGAACCAAAatgagtaaaggagaaga            | overlapping sequences for smGFP              | 5'UTR      |
|                  | AT5G46430_5'-UTR                       | CTCTAATCACCAGGAGTAAAatgagtaaaggagaaga            | overlapping sequences for smGFP              | 5'UTR      |
|                  | AT5G47110_5'-UTR                       | GAGAGAGATCTTAACAAAAAatgagtaaaggagaaga            | overlapping sequences for smGFP              | 5'UTR      |
|                  | AT1G03110_5'-UTR                       | TGTGTAACAACAACAACAACAatgagtaaaggagaaga           | overlapping sequences for smGFP              | 5'UTR      |
|                  | AT3G12380_5'-UTR                       | CCGAGTAGGAAGAGAAAGCCatgagtaaaggagaaga            | overlapping sequences for smGFP              | 5'UTR      |
|                  | AT5G45910_5'-UTR                       | AAAAAAAAGAAATCATAAAatgagtaaaggagaaga             | overlapping sequences for smGFP              | 5'UTR      |
|                  | AT1G58420_5'-UTR                       | ATTATTACATCAAAAACAAAatgagtaaaggagaaga            | overlapping sequences for smGFP              | 5'UTR      |
|                  | AT5G44520_5'-UTR                       | CGTTCTCCACACAAAAAatgagtaaaggagaaga               | overlapping sequences for smGFP              | 5'UTR      |
|                  | AT1G07260_5'-UTR                       | GAGAGAAGAAAGAAAGAGCAtgagtaaaggagaaga             | overlapping sequences for smGFP              | 5'UTR      |
|                  | AT3G55500_5'-UTR                       | CAATTAATAACTTACCAAAatgagtaaaggagaaga             | overlapping sequences for smGFP              | 5'UTR      |
|                  | AT3G46230_5'-UTR                       | GCAACACAGTAAGCCAAACAtgagtaaaggagaaga             | overlapping sequences for smGFP              | 5'UTR      |
|                  | AT2G36170_5'-UTR                       | GCGAAGAAAGCAAGCAAGCAtgagtaaaggagaaga             | overlapping sequences for smGFP              | 5'UTR      |
|                  | AT1G10660_5'-UTR                       | TTAGGACTGTATTGACTGGCAtgagtaaaggagaaga            | overlapping sequences for smGFP              | 5'UTR      |
|                  | AT4G14340_5'-UTR                       | ATCATCGGAATTCGAAAAAatgagtaaaggagaaga             | overlapping sequences for smGFP              | 5'UTR      |
|                  | AT1G49310_5'-UTR                       | AAAAAAAAGTTAAAGCAGACatgagtaaaggagaaga            | overlapping sequences for smGFP              | 5'UTR      |
|                  | AT4G14360_5'-UTR                       | TTTATCTCAAATAAGAGGCAtgagtaaaggagaaga             | overlapping sequences for smGFP              | 5'UTR      |
|                  | AT1G28520_5'-UTR                       | GGTGGGGAGGTGAGATTCTTatgagtaaaggagaaga            | overlapping sequences for smGFP              | 5'UTR      |
|                  | AT1G20160_5'-UTR                       | TGATTAGAAACTACAAAGCAtgagtaaaggagaaga             | overlapping sequences for smGFP              | 5'UTR      |
| AT5G37370_5'-UTR | CATTTTTCAATTTTCATAAAAatgagtaaaggagaaga | overlapping sequences for smGFP                  | 5'UTR                                        |            |
| AT4G11320_5'-UTR | TTACTTTTAAGCCCAACAAAatgagtaaaggagaaga  | overlapping sequences for smGFP                  | 5'UTR                                        |            |
| AT5G40850_5'-UTR | GGCGTGTGTGTGTGTGTGAatgagtaaaggagaaga   | overlapping sequences for smGFP                  | 5'UTR                                        |            |
| AT1G06150_5'-UTR | TGGTGAAGGGGAAGGTTTGAatgagtaaaggagaaga  | overlapping sequences for smGFP                  | 5'UTR                                        |            |
| AT2G26080_5'-UTR | TTGTTTTTTTTGGTTTGGTTatgagtaaaggagaaga  | overlapping sequences for smGFP                  | 5'UTR                                        |            |
| P5               | Good UTR Triple Adenine_1              | AAAACATAAAGTAGAAGAAAatgagtaaaggagaaga            | overlapping sequences for smGFP              | 5'UTR      |
|                  | Good UTR Triple Adenine_2              | AAAAATAAAGTAGAAGAAAatgagtaaaggagaaga             | overlapping sequences for smGFP              | 5'UTR      |
|                  | Good UTR Triple Adenine_3              | AACAAAAAAGTAGAAGAAAatgagtaaaggagaaga             | overlapping sequences for smGFP              | 5'UTR      |
|                  | Good UTR Triple Adenine_4              | AACACAAAAAGTAGAAGAAAatgagtaaaggagaaga            | overlapping sequences for smGFP              | 5'UTR      |
|                  | Good UTR Triple Adenine_5              | AACACTAAAAATAGAAGAAAatgagtaaaggagaaga            | overlapping sequences for smGFP              | 5'UTR      |
|                  | Good UTR Triple Adenine_6              | AACACTAAAAAAGAAAGAAAatgagtaaaggagaaga            | overlapping sequences for smGFP              | 5'UTR      |
|                  | Good UTR Triple Adenine_7              | AACACTAAAAAAGAAAGAAAatgagtaaaggagaaga            | overlapping sequences for smGFP              | 5'UTR      |
|                  | Good UTR Triple Adenine_8              | AACACTAAAAAGTAAAGAAAatgagtaaaggagaaga            | overlapping sequences for smGFP              | 5'UTR      |
|                  | Good UTR Triple Adenine_9              | AACACTAAAAAGTAAAGAAAatgagtaaaggagaaga            | overlapping sequences for smGFP              | 5'UTR      |
| P6               | Good UTR Triple Thymine_1              | TTTACTAAAAGTAGAAGAAAatgagtaaaggagaaga            | overlapping sequences for smGFP              | 5'UTR      |
|                  | Good UTR Triple Thymine_2              | ATTTCTAAAAGTAGAAGAAAatgagtaaaggagaaga            | overlapping sequences for smGFP              | 5'UTR      |
|                  | Good UTR Triple Thymine_3              | AATTTTAAAAGTAGAAGAAAatgagtaaaggagaaga            | overlapping sequences for smGFP              | 5'UTR      |
|                  | Good UTR Triple Thymine_4              | AACTTTAAAAGTAGAAGAAAatgagtaaaggagaaga            | overlapping sequences for smGFP              | 5'UTR      |
|                  | Good UTR Triple Thymine_5              | AACATTTAAAAGTAGAAGAAAatgagtaaaggagaaga           | overlapping sequences for smGFP              | 5'UTR      |
|                  | Good UTR Triple Thymine_6              | AACACTTTAAGTAGAAGAAAatgagtaaaggagaaga            | overlapping sequences for smGFP              | 5'UTR      |
|                  | Good UTR Triple Thymine_7              | AACACTTTTAGTAGAAGAAAatgagtaaaggagaaga            | overlapping sequences for smGFP              | 5'UTR      |
|                  | Good UTR Triple Thymine_8              | AACACTATTTGTAGAAGAAAatgagtaaaggagaaga            | overlapping sequences for smGFP              | 5'UTR      |
|                  | Good UTR Triple Thymine_9              | AACACTAATTTTAGAAGAAAatgagtaaaggagaaga            | overlapping sequences for smGFP              | 5'UTR      |
|                  | Good UTR Triple Thymine_10             | AACACTAAATTTAGAAGAAAatgagtaaaggagaaga            | overlapping sequences for smGFP              | 5'UTR      |
|                  | Good UTR Triple Thymine_11             | AACACTAAATTTGAGAAGAAAatgagtaaaggagaaga           | overlapping sequences for smGFP              | 5'UTR      |
|                  | Good UTR Triple Thymine_12             | AACACTAAAAGTTTAAAGAAAatgagtaaaggagaaga           | overlapping sequences for smGFP              | 5'UTR      |
|                  | Good UTR Triple Thymine_13             | AACACTAAAAGTTTAAAGAAAatgagtaaaggagaaga           | overlapping sequences for smGFP              | 5'UTR      |
|                  | Good UTR Triple Thymine_14             | AACACTAAAAGTATTTGAAAatgagtaaaggagaaga            | overlapping sequences for smGFP              | 5'UTR      |
|                  | Good UTR Triple Thymine_15             | AACACTAAAAGTAGTTTTAAAatgagtaaaggagaaga           | overlapping sequences for smGFP              | 5'UTR      |
|                  | Good UTR Triple Thymine_16             | AACACTAAAAGTAGATTTAAAatgagtaaaggagaaga           | overlapping sequences for smGFP              | 5'UTR      |
|                  | Good UTR Triple Thymine_17             | AACACTAAAAGTAGAATTTAAAatgagtaaaggagaaga          | overlapping sequences for smGFP              | 5'UTR      |
|                  | Good UTR Triple Thymine_18             | AACACTAAAAGTAGAAGTTTAAAatgagtaaaggagaaga         | overlapping sequences for smGFP              | 5'UTR      |
|                  | Good UTR Triple Thymine_19             | AACACTAAAAGTAGAAGATTTatgagtaaaggagaaga           | overlapping sequences for smGFP              | 5'UTR      |
| P7               | Good UTR Triple Guanine_1              | GGGACTAAAAGTAGAAGAAAatgagtaaaggagaaga            | overlapping sequences for smGFP              | 5'UTR      |
|                  | Good UTR Triple Guanine_2              | AGGGCTAAAAGTAGAAGAAAatgagtaaaggagaaga            | overlapping sequences for smGFP              | 5'UTR      |
|                  | Good UTR Triple Guanine_3              | AGGGGTAAAAGTAGAAGAAAatgagtaaaggagaaga            | overlapping sequences for smGFP              | 5'UTR      |
|                  | Good UTR Triple Guanine_4              | AACGGGAAAAGTAGAAGAAAatgagtaaaggagaaga            | overlapping sequences for smGFP              | 5'UTR      |
|                  | Good UTR Triple Guanine_5              | AACAGGGAAAAGTAGAAGAAAatgagtaaaggagaaga           | overlapping sequences for smGFP              | 5'UTR      |
|                  | Good UTR Triple Guanine_6              | AACACGGGAAGTAGAAGAAAatgagtaaaggagaaga            | overlapping sequences for smGFP              | 5'UTR      |
|                  | Good UTR Triple Guanine_7              | AACACTGGGAGTAGAAGAAAatgagtaaaggagaaga            | overlapping sequences for smGFP              | 5'UTR      |
|                  | Good UTR Triple Guanine_8              | AACACTAGGGGTAGAAGAAAatgagtaaaggagaaga            | overlapping sequences for smGFP              | 5'UTR      |
|                  | Good UTR Triple Guanine_9              | AACACTAAGGGTAGAAGAAAatgagtaaaggagaaga            | overlapping sequences for smGFP              | 5'UTR      |
|                  | Good UTR Triple Guanine_10             | AACACTAAAGGGGAGAAGAAAatgagtaaaggagaaga           | overlapping sequences for smGFP              | 5'UTR      |
|                  | Good UTR Triple Guanine_11             | AACACTAAAAGGGGAGAAGAAAatgagtaaaggagaaga          | overlapping sequences for smGFP              | 5'UTR      |
|                  | Good UTR Triple Guanine_12             | AACACTAAAAGTGGGAGAAGAAAatgagtaaaggagaaga         | overlapping sequences for smGFP              | 5'UTR      |
|                  | Good UTR Triple Guanine_13             | AACACTAAAAGTAGGGGAAAatgagtaaaggagaaga            | overlapping sequences for smGFP              | 5'UTR      |
|                  | Good UTR Triple Guanine_14             | AACACTAAAAGTAGAGGAAAatgagtaaaggagaaga            | overlapping sequences for smGFP              | 5'UTR      |
|                  | Good UTR Triple Guanine_15             | AACACTAAAAGTAGAAGGAAAatgagtaaaggagaaga           | overlapping sequences for smGFP              | 5'UTR      |
|                  | Good UTR Triple Guanine_16             | AACACTAAAAGTAGAAGGGAAAatgagtaaaggagaaga          | overlapping sequences for smGFP              | 5'UTR      |
|                  | Good UTR Triple Guanine_17             | AACACTAAAAGTAGAAGAGGGAatgagtaaaggagaaga          | overlapping sequences for smGFP              | 5'UTR      |

|     |                             |                                                     |                                  |        |
|-----|-----------------------------|-----------------------------------------------------|----------------------------------|--------|
| P8  | Good UTR Triple Cytosine_1  | CCCCTAAAAGTAGAAGAAAAtgagtaaaggagaagaa               | overlapping sequences for smGFP  | 5'UTR  |
|     | Good UTR Triple Cytosine_2  | ACCCCTAAAAGTAGAAGAAAAtgagtaaaggagaagaa              | overlapping sequences for smGFP  | 5'UTR  |
|     | Good UTR Triple Cytosine_3  | AACCCCTAAAAGTAGAAGAAAAtgagtaaaggagaagaa             | overlapping sequences for smGFP  | 5'UTR  |
|     | Good UTR Triple Cytosine_4  | AACCCCAAAGTAGAAGAAAAtgagtaaaggagaagaa               | overlapping sequences for smGFP  | 5'UTR  |
|     | Good UTR Triple Cytosine_5  | AACACCCAAAGTAGAAGAAAAtgagtaaaggagaagaa              | overlapping sequences for smGFP  | 5'UTR  |
|     | Good UTR Triple Cytosine_6  | AACACCCCAAGTAGAAGAAAAtgagtaaaggagaagaa              | overlapping sequences for smGFP  | 5'UTR  |
|     | Good UTR Triple Cytosine_7  | AACACTCCCAGTAGAAGAAAAtgagtaaaggagaagaa              | overlapping sequences for smGFP  | 5'UTR  |
|     | Good UTR Triple Cytosine_8  | AACACTACCCGTAGAAGAAAAtgagtaaaggagaagaa              | overlapping sequences for smGFP  | 5'UTR  |
|     | Good UTR Triple Cytosine_9  | AACACTAACCTAGAAGAAAAtgagtaaaggagaagaa               | overlapping sequences for smGFP  | 5'UTR  |
|     | Good UTR Triple Cytosine_10 | AACACTAAACCAGAAGAAAAtgagtaaaggagaagaa               | overlapping sequences for smGFP  | 5'UTR  |
|     | Good UTR Triple Cytosine_11 | AACACTAAAACCCGAAGAAAAtgagtaaaggagaagaa              | overlapping sequences for smGFP  | 5'UTR  |
|     | Good UTR Triple Cytosine_12 | AACACTAAAAGCCCCAAGAAAAtgagtaaaggagaagaa             | overlapping sequences for smGFP  | 5'UTR  |
|     | Good UTR Triple Cytosine_13 | AACACTAAAAGTCCCAGAAAAtgagtaaaggagaagaa              | overlapping sequences for smGFP  | 5'UTR  |
|     | Good UTR Triple Cytosine_14 | AACACTAAAAGTACCCGAAAAtgagtaaaggagaagaa              | overlapping sequences for smGFP  | 5'UTR  |
|     | Good UTR Triple Cytosine_15 | AACACTAAAAGTAGCCCAAAAAtgagtaaaggagaagaa             | overlapping sequences for smGFP  | 5'UTR  |
|     | Good UTR Triple Cytosine_16 | AACACTAAAAGTAGACCCAAAAtgagtaaaggagaagaa             | overlapping sequences for smGFP  | 5'UTR  |
|     | Good UTR Triple Cytosine_17 | AACACTAAAAGTAGAACCCAAAtgagtaaaggagaagaa             | overlapping sequences for smGFP  | 5'UTR  |
|     | Good UTR Triple Cytosine_18 | AACACTAAAAGTAGAAGCCCAAtgagtaaaggagaagaa             | overlapping sequences for smGFP  | 5'UTR  |
|     | Good UTR Triple Cytosine_19 | AACACTAAAAGTAGAAGACCAtgagtaaaggagaagaa              | overlapping sequences for smGFP  | 5'UTR  |
| P9  | Poor UTR Triple Adenine_1   | AAAGTGTGTGTGTGTGTTGAAtgagtaaaggagaagaa              | overlapping sequences for smGFP  | 5'UTR  |
|     | Poor UTR Triple Adenine_2   | GAAATGTGTGTGTGTGTTGAAtgagtaaaggagaagaa              | overlapping sequences for smGFP  | 5'UTR  |
|     | Poor UTR Triple Adenine_3   | GGAAGTGTGTGTGTGTTGAAtgagtaaaggagaagaa               | overlapping sequences for smGFP  | 5'UTR  |
|     | Poor UTR Triple Adenine_4   | GGCAAATGTGTGTGTGTTGAAtgagtaaaggagaagaa              | overlapping sequences for smGFP  | 5'UTR  |
|     | Poor UTR Triple Adenine_5   | GGCGAAAGTGTGTGTGTTGAAtgagtaaaggagaagaa              | overlapping sequences for smGFP  | 5'UTR  |
|     | Poor UTR Triple Adenine_6   | GGCGTAAATGTGTGTGTTGAAtgagtaaaggagaagaa              | overlapping sequences for smGFP  | 5'UTR  |
|     | Poor UTR Triple Adenine_7   | GGCGTAAAAGTGTGTGTTGAAtgagtaaaggagaagaa              | overlapping sequences for smGFP  | 5'UTR  |
|     | Poor UTR Triple Adenine_8   | GGCGTGAATGTGTGTGTTGAAtgagtaaaggagaagaa              | overlapping sequences for smGFP  | 5'UTR  |
|     | Poor UTR Triple Adenine_9   | GGCGTGAAGTGTGTGTTGAAtgagtaaaggagaagaa               | overlapping sequences for smGFP  | 5'UTR  |
|     | Poor UTR Triple Adenine_10  | GGCGTGTGTAATGTGTGTTGAAtgagtaaaggagaagaa             | overlapping sequences for smGFP  | 5'UTR  |
|     | Poor UTR Triple Adenine_11  | GGCGTGTGTAAGTGTGTTGAAtgagtaaaggagaagaa              | overlapping sequences for smGFP  | 5'UTR  |
|     | Poor UTR Triple Adenine_12  | GGCGTGTGTGTAATGTGTTGAAtgagtaaaggagaagaa             | overlapping sequences for smGFP  | 5'UTR  |
|     | Poor UTR Triple Adenine_13  | GGCGTGTGTGTAATGTGTTGAAtgagtaaaggagaagaa             | overlapping sequences for smGFP  | 5'UTR  |
|     | Poor UTR Triple Adenine_14  | GGCGTGTGTGTAAAGTGTGTTGAAtgagtaaaggagaagaa           | overlapping sequences for smGFP  | 5'UTR  |
|     | Poor UTR Triple Adenine_15  | GGCGTGTGTGTGAAATGTAAtgagtaaaggagaagaa               | overlapping sequences for smGFP  | 5'UTR  |
|     | Poor UTR Triple Adenine_16  | GGCGTGTGTGTGTAAATGTAAtgagtaaaggagaagaa              | overlapping sequences for smGFP  | 5'UTR  |
|     | Poor UTR Triple Adenine_17  | GGCGTGTGTGTGTAAAGTGAAtgagtaaaggagaagaa              | overlapping sequences for smGFP  | 5'UTR  |
|     | Poor UTR Triple Adenine_18  | GGCGTGTGTGTGTGAAAGTGAAtgagtaaaggagaagaa             | overlapping sequences for smGFP  | 5'UTR  |
|     | Poor UTR Triple Adenine_19  | GGCGTGTGTGTGTGTAATGTAAtgagtaaaggagaagaa             | overlapping sequences for smGFP  | 5'UTR  |
| P10 | UTR-good:TRP1_5'            | ATTATTACATCAAAACAAAAtgtctgttattattcacagg            | overlapping sequences for TRP I  | 5'UTR  |
|     | UTR-poor:TRP1_5'            | GGCGTGTGTGTGTGTTGTAAtgtctgttattattcacagg            | overlapping sequences for TRP I  | 5'UTR  |
| P11 | TRP1_3'                     | TCAAGCGTAATCTGGAACATCGTATGGGTAttcttagcttttgacgaaatt | overlapping sequences for TRP I  | HA tag |
| P12 | UTR-good:NPT II_5'          | ATTATTACATCAAAACAAAAtgattgaaacaagatgattgca          | overlapping sequences for NPT II | 5'UTR  |
|     | UTR-poor:NPT II_5'          | GGCGTGTGTGTGTGTTGTAAtgattgaaacaagatgattgca          | overlapping sequences for NPT II | 5'UTR  |
| P13 | NPT II-3'                   | tcagaagaactctgaagaag                                | overlapping sequences for NPT II | -      |

Supplemental Table S2. The nucleotide sequences of primers for qRT

| <b>Target</b>                 | <b>name of primer</b> | <b>sequence</b>        |
|-------------------------------|-----------------------|------------------------|
| smGFP                         | GFP_q5                | AAGAGCGCCATGCCTGAGGG   |
|                               | GFP_q3                | GCTCGATCCTGTTGACGAGGG  |
| ACT2 (At3g18780)              | ACT2_q5               | TATGAATTACCCGATGGGCAAG |
|                               | ACT2_q3               | TGGAACAAGACTTCTGGGCAT  |
| $\beta$ -glucuronidase        | GUS_q5                | CAAAGCGGCGATTTGGAA     |
|                               | GUS_q3                | GCCAGGCCAGAAGTTCTTTT   |
| hygromycin phosphotransferase | HYG_q5                | GATGTTGGCGACCTCGTATT   |
|                               | HYG_q3                | ATTTTCGGCTCCAACAATGTC  |
